# Supplementary material for: Emergence of promising n-type thermoelectric material through conductive network and strong phonon softening
Source: Royal Society of Chemistry journal article supplement (doi:10.1039/d4tc01235f), 2024-01-01
Supplement: d4tc01235f1.pdf [file d4tc01235f1.pdf]

## SUPPORTING INFORMATION

| Systems | Temperature (K) | Mobility ( $\text{cm}^2 \text{V}^{-1} \text{s}^{-1}$ ) |                 |
|---------|-----------------|--------------------------------------------------------|-----------------|
|         |                 | <i>p</i> – type                                        | <i>n</i> – type |

### Emergence of promising *n* – type thermoelectric material through conductive network and strong phonon softening

Jipin P M,<sup>1</sup> Tanu Choudhary,<sup>1</sup> Raju K Biswas \*,<sup>1</sup>

<sup>1</sup>*Department of Physics, Faculty of Mathematical and Physical Sciences*

*M S Ramaiah University of Applied Sciences,*

*Bengaluru 560058, India, \*rajukumar1718@gmail.com*

**Table S1. Calculated lattice parameters (a=b), bond length (d), bond angle and band gap of HfSe<sub>2</sub>, Janus HfSeS and HfSeS<sub>0.5</sub>Te<sub>0.5</sub> monolayers.**

| Systems                                | Lattice constant, a=b (Å) | Bond length, d (Å)                                | Bond angle (Degree)                                                    | Band gap (eV)         |
|----------------------------------------|---------------------------|---------------------------------------------------|------------------------------------------------------------------------|-----------------------|
| HfSe <sub>2</sub>                      | 3.76 <sup>24,51</sup>     | 2.68 (Hf – Se) <sup>24,51</sup>                   | 81.45° (Hf – Se – Hf)                                                  | 0.67 <sup>24,52</sup> |
| HfSeS                                  | 3.70                      | 2.68 (Hf – Se)<br>2.54 (Hf – S)                   | 87.45° (Hf – Se – Hf)<br>93.24° (Hf – S – Hf)                          | 0.88                  |
| HfSeS <sub>0.5</sub> Te <sub>0.5</sub> | 7.62                      | 2.68 (Hf – Se)<br>2.57 (Hf – S)<br>2.90 (Hf – Te) | 88.01° (Hf – Se – Hf)<br>93.19° (Hf – S – Hf)<br>83.78° (Hf – Te – Hf) | 0.11                  |

| Systems                                | Temperature (K) | $\mu_p$ (cm <sup>2</sup> /V·s) | $\mu_n$ (cm <sup>2</sup> /V·s) |
|----------------------------------------|-----------------|--------------------------------|--------------------------------|
| HfSe <sub>2</sub>                      | 300             | 1252.50                        | 395.87                         |
|                                        | 450             | 835.00                         | 263.91                         |
|                                        | 600             | 626.25                         | 197.93                         |
|                                        | 750             | 501.00                         | 158.34                         |
|                                        | 900             | 417.50                         | 131.95                         |
|                                        | 1050            | 357.85                         | 113.10                         |
| HfSeS                                  | 300             | 2318.02                        | 894.40                         |
|                                        | 450             | 2878.68                        | 596.47                         |
|                                        | 600             | 2169.01                        | 402.35                         |
|                                        | 750             | 1729.20                        | 365.88                         |
|                                        | 900             | 1439.63                        | 298.23                         |
|                                        | 1050            | 1209.72                        | 236.23                         |
| HfSeS <sub>0.5</sub> Te <sub>0.5</sub> | 300             | 8250.83                        | 3034.65                        |
|                                        | 450             | 5982.56                        | 2023.10                        |
|                                        | 600             | 4486.91                        | 1517.32                        |
|                                        | 750             | 3589.53                        | 1213.86                        |
|                                        | 900             | 2991.28                        | 1011.55                        |
|                                        | 1050            | 2563.95                        | 867.04                         |
|                                        | 1200            | 2243.45                        | 758.66                         |

**Table S2.** Calculated carrier mobility for  $p$  and  $n$  – type HfSe<sub>2</sub>, Janus HfSeS and HfSeS<sub>0.5</sub>Te<sub>0.5</sub> monolayers at different temperatures.

|                                            |      |      |                   |      |     |
|--------------------------------------------|------|------|-------------------|------|-----|
|                                            | 300  | 1386 |                   | 1372 |     |
|                                            | 450  | 921  |                   | 894  |     |
| <b>Systems</b><br><b>HfSeS</b>             | 600  | 681  | $\kappa_l$ (W/mK) | 647  |     |
|                                            | 750  | 539  |                   | 496  |     |
|                                            | 900  | 440  |                   | 403  |     |
|                                            | 1050 | 372  |                   | 1.65 | 336 |
|                                            | 1200 | 324  |                   | 1.29 | 280 |
| <b>HfSe<sub>2</sub></b>                    | 600  |      | 1.03              |      |     |
|                                            | 750  | 2773 | 0.85              | 2920 |     |
|                                            | 900  | 2058 | 0.72              | 2016 |     |
|                                            | 1050 | 1596 | 0.62              | 1554 |     |
|                                            | 1200 | 1302 | 0.54              | 1260 |     |
| <b>HfSeS<sub>0.5</sub>Te<sub>0.5</sub></b> | 900  | 1120 |                   | 1078 |     |
|                                            | 1050 | 973  | 1.92              | 959  |     |
|                                            | 1200 | 876  | 1.58              | 850  |     |
|                                            | 600  |      | 1.29              |      |     |
|                                            | 750  |      | 1.07              |      |     |
| <b>HfSeS</b>                               | 900  |      | 0.91              |      |     |
|                                            | 1050 |      | 0.79              |      |     |
|                                            | 1200 |      | 0.69              |      |     |
|                                            | 300  |      | 1.07              |      |     |
|                                            | 450  |      | 0.87              |      |     |
| <b>HfSeS<sub>0.5</sub>Te<sub>0.5</sub></b> | 600  |      | 0.70              |      |     |
|                                            | 750  |      | 0.58              |      |     |
|                                            | 900  |      | 0.49              |      |     |

**Table S3. Calculated Seebeck coefficient values of  $p$  and  $n$  – type HfSe<sub>2</sub>, Janus HfSeS and HfSeS<sub>0.5</sub>Te<sub>0.5</sub> monolayers at different temperatures.**

|      |      |
|------|------|
| 1050 | 0.42 |
| 1200 | 0.37 |

**Table S4.** Calculated lattice thermal conductivity ( $\kappa_l$ ) values for HfSe<sub>2</sub>, Janus HfSeS and HfSeS<sub>0.5</sub>Te<sub>0.5</sub> monolayers at different temperatures.

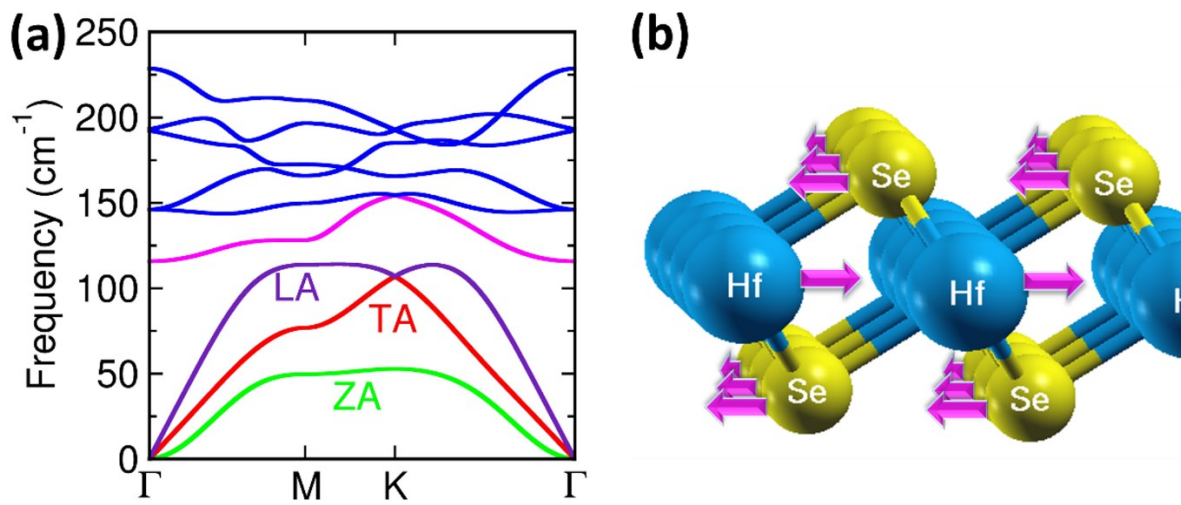

**Fig. S1** (a) Phonon dispersion bands along  $\Gamma - M - K - \Gamma$  direction in the Brillouin zone and (b) Eigen vectors for HfSe<sub>2</sub> monolayer.

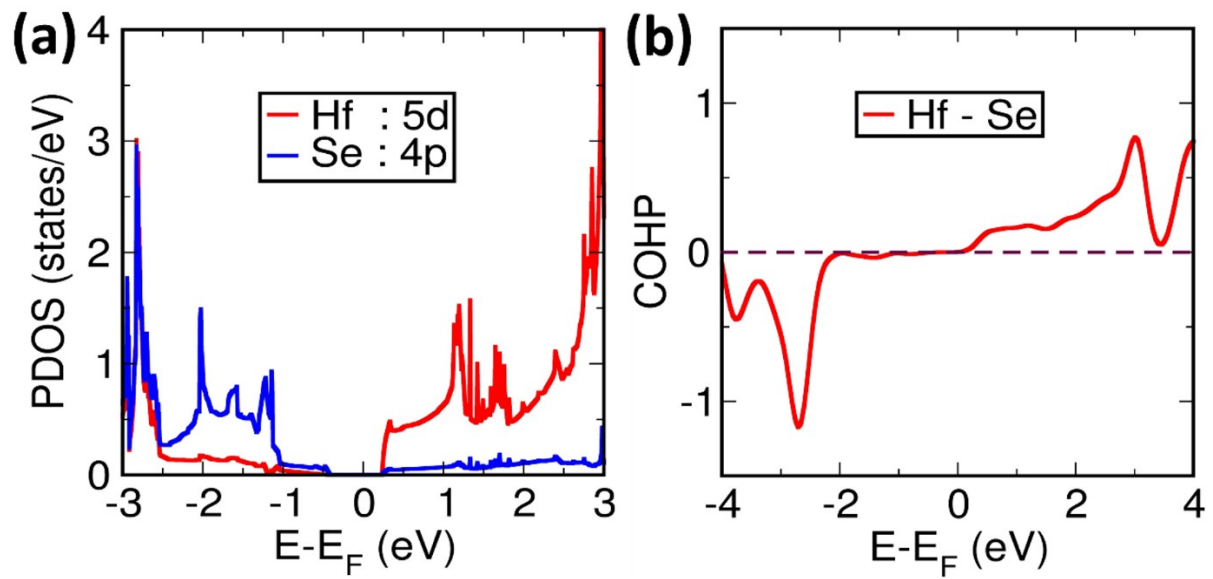

**Fig. S2 (a) Projected density of states and (b) crystal orbital Hamilton population (COHP) plot as a function of energy (E) for HfSe<sub>2</sub> monolayer.**

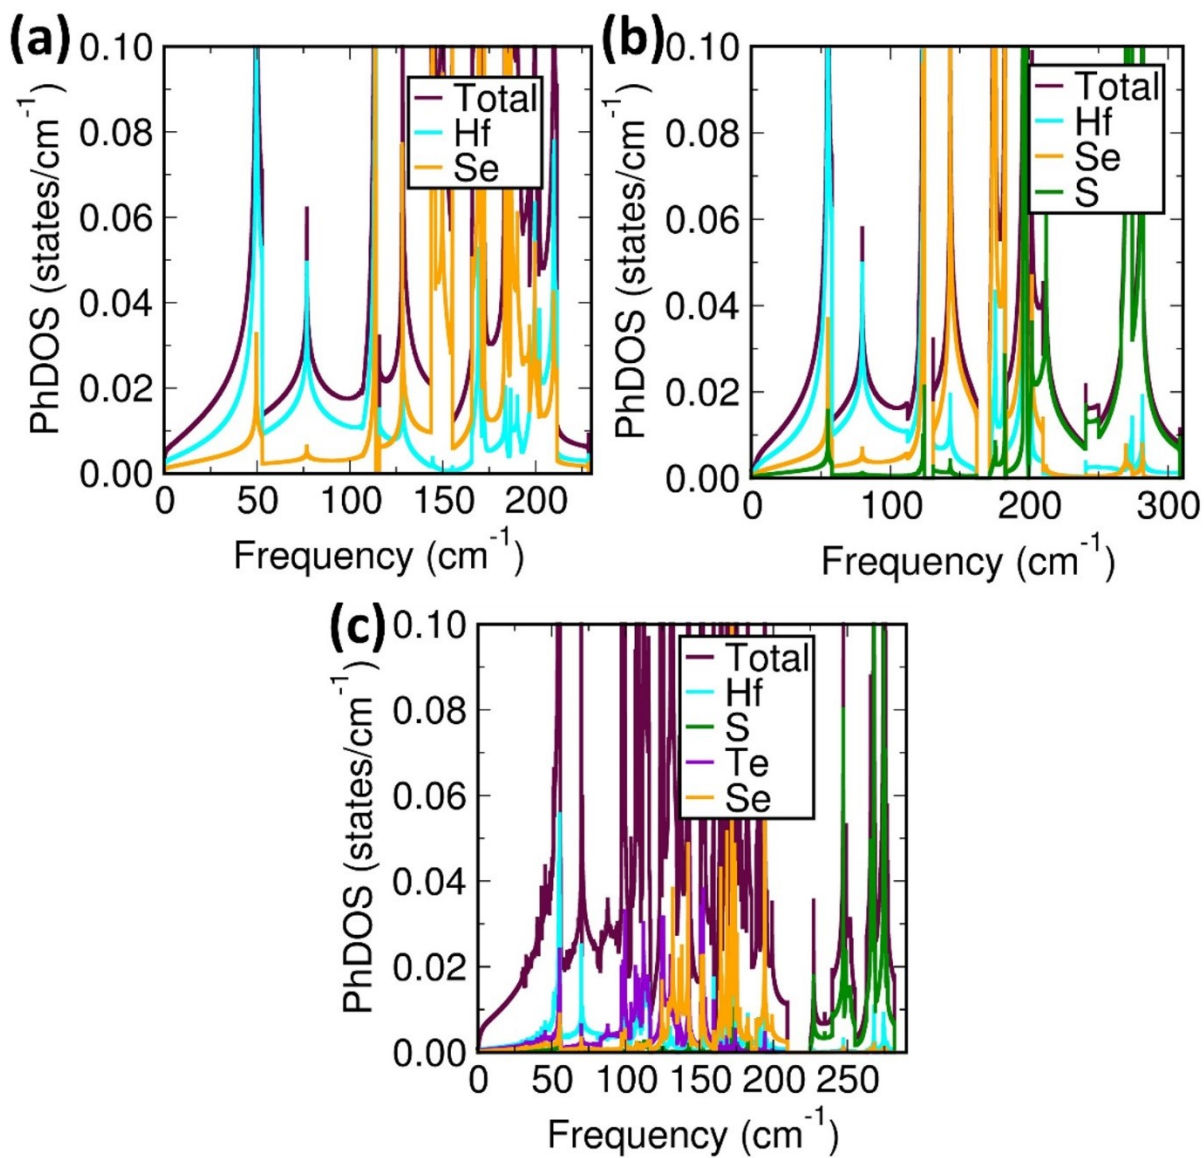

**Fig. S3** Phonon density of states for (a) HfSe<sub>2</sub>, (b) Janus HfSeS and (c) HfSeS<sub>0.5</sub>Te<sub>0.5</sub> monolayers, respectively.

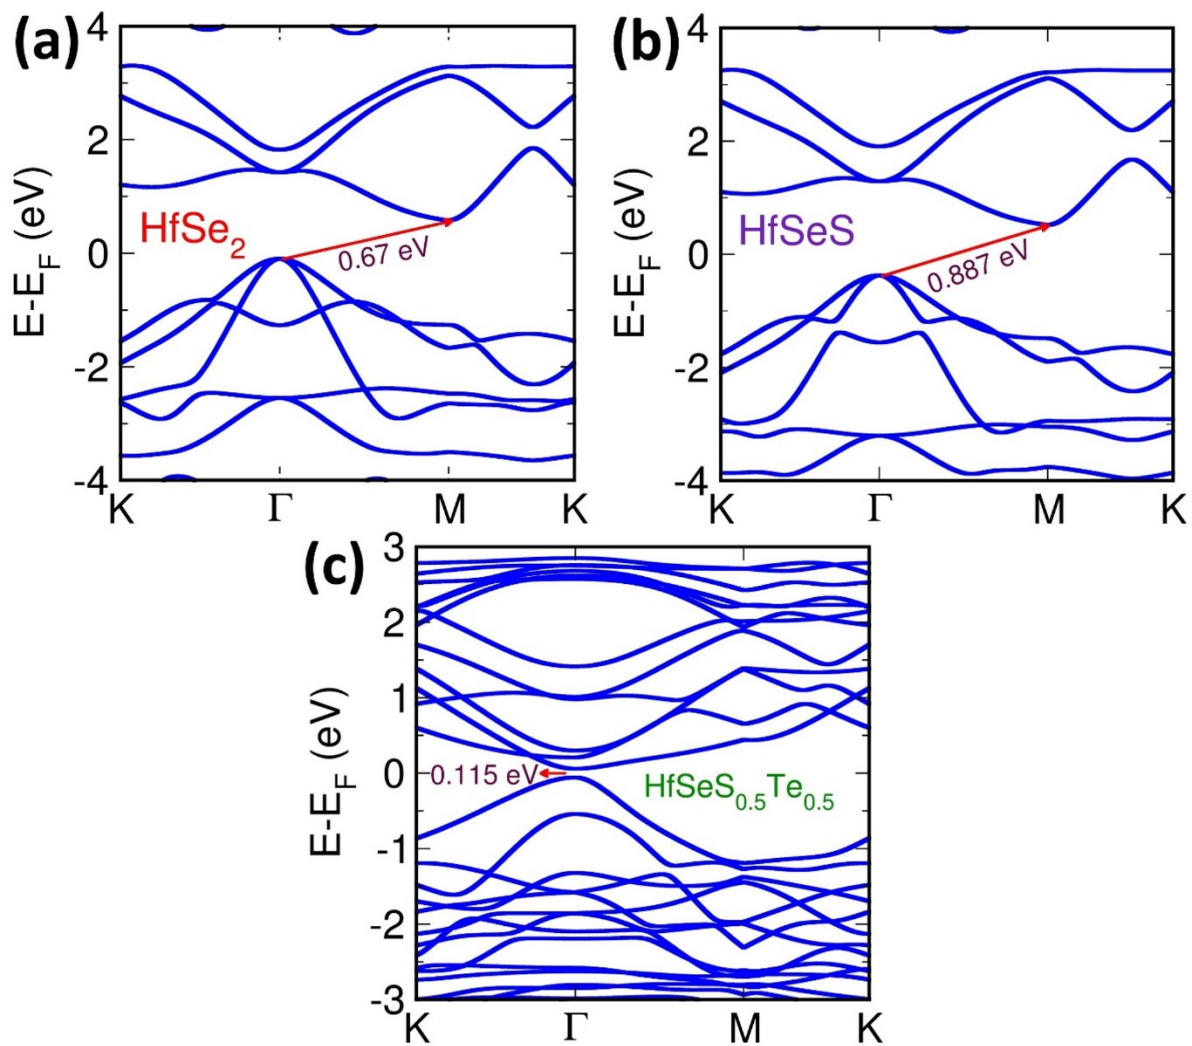

**Fig. S4** Electronic band structure calculated along the high symmetry points  $K-\Gamma-M-K$  using density functional theory (DFT) within PBE functional for (a)  $\text{HfSe}_2$ , (b) Janus  $\text{HfSeS}$  and (c)  $\text{HfSeS}_{0.5}\text{Te}_{0.5}$  monolayers, respectively.

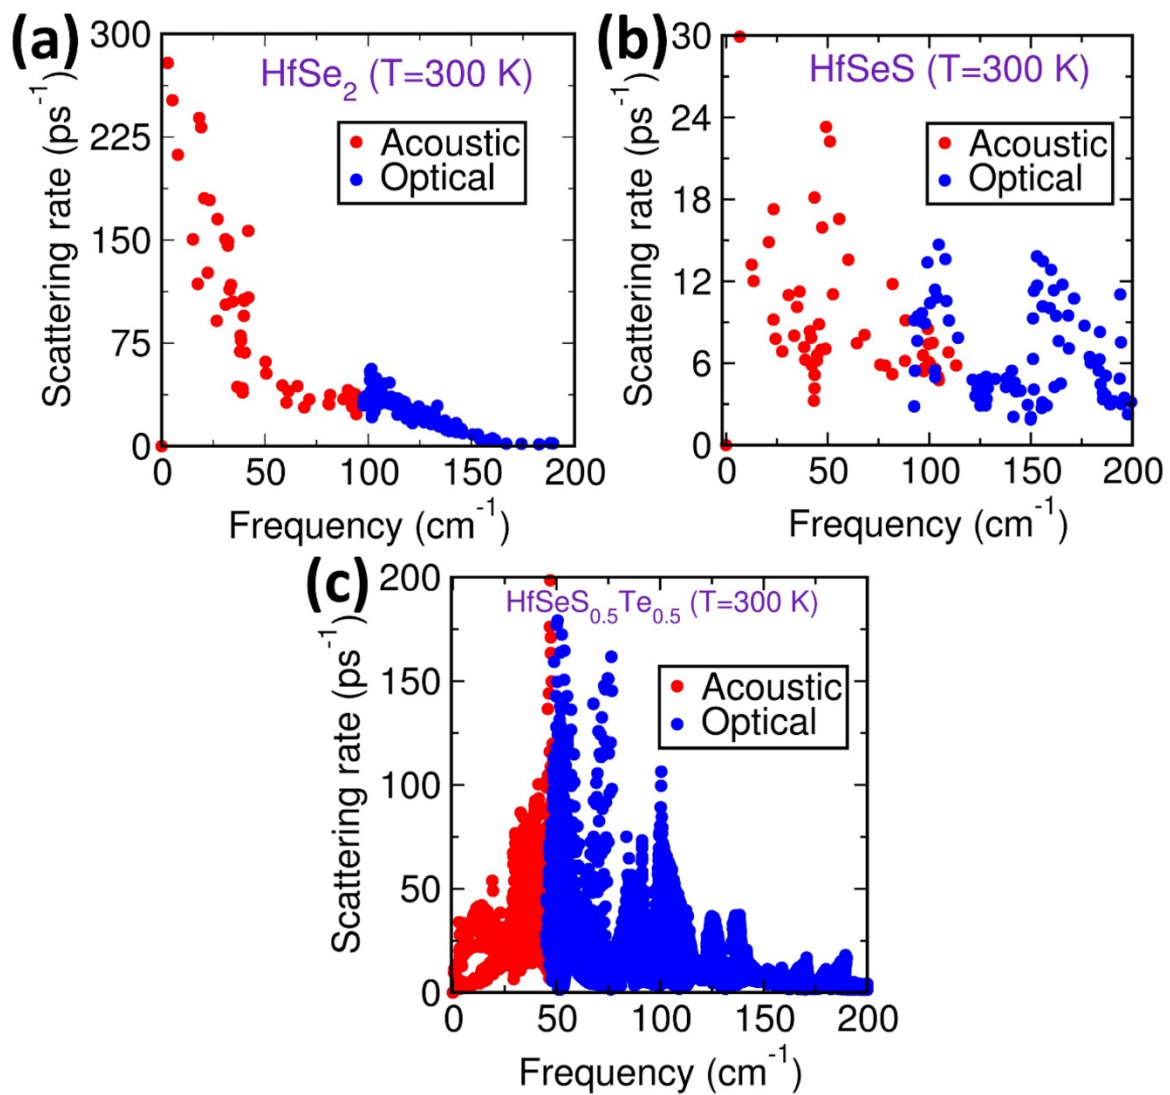

**Fig. S5** Phonon scattering rate as a function of phonon frequency for (a) HfSe<sub>2</sub>, (b) Janus HfSeS and (c) HfSeS<sub>0.5</sub>Te<sub>0.5</sub> monolayers, respectively at 300 K. Red and blue colour corresponds to acoustic and optical phonons, respectively.
